# Supplementary material for: A comparison of performance of plant miRNA target prediction tools and the characterization of features for genome-wide target prediction
Source: PubMed Central journal article supplement (PMC4035075; doi:10.1186/1471-2164-15-348), 2014-05-08
Supplement: 12864_2014_6052_MOESM1_ESM.pdf [file 12864_2014_6052_MOESM1_ESM.pdf]

# Published tools

|                   |
|-------------------|
| Patscan           |
| Targetfinder      |
| miRNAassist       |
| WMD3              |
| Helper tool       |
| Tapirfasta        |
| Tapirhybrid       |
| Target-align      |
| Target_Prediciton |
| psRNATarget       |
| miRtour           |
| p-TAREF           |
| psRobot           |
| Slice detector    |
| imiRTP            |
| miRanda           |
| RNAhybrid         |
| Targetscan        |

## Functional Tools

|                   |
|-------------------|
| Targetfinder      |
| Tapirfasta        |
| Tapirhybrid       |
| Target-align      |
| Target_Prediciton |
| psRNATarget       |
| p-TAREF           |
| psRobot           |
| miRanda           |
| RNAhybrid         |
| Targetscan        |

## Stage I

Run -time evaluation

|              |
|--------------|
| Target-align |
| p-TAREF      |
| miRanda      |

## Stage II

Tool evaluation (Precision and Recall)

- Slow running time
- Slow running time
- High false positives

## Tools at their optimum score cutoffs

|                   |
|-------------------|
| Tapirfasta        |
| Tapirhybrid       |
| Target_Prediction |
| psRNATarget       |
| psRobot           |
| Targetfinder      |

Additional file 1
