# Supplementary material for: A comparison of performance of plant miRNA target prediction tools and the characterization of features for genome-wide target prediction
Source: PubMed Central journal article supplement (PMC4035075; doi:10.1186/1471-2164-15-348), 2014-05-08
Supplement: 12864_2014_6052_MOESM2_ESM.pdf [file 12864_2014_6052_MOESM2_ESM.pdf]

|                   | miRanda | psRNATarget | psRobot | RNAhybrid | Tapirfasta | Tapirhybrid | Targetfinder | Target_Prediction | Targetscan |
|-------------------|---------|-------------|---------|-----------|------------|-------------|--------------|-------------------|------------|
| miRanda           | 5501298 | 2614        | 7121    | 365567    | 1377       | 4517        | 5570         | 1944              | 754848     |
| psRNATarget       |         | 2789        | 1916    | 1794      | 1095       | 1508        | 1543         | 1144              | 1140       |
| psRobot           |         |             | 8004    | 4383      | 1256       | 3273        | 4340         | 1488              | 4087       |
| RNAhybrid         |         |             |         | 9282494   | 939        | 3394        | 3027         | 1235              | 105484     |
| Tapirfasta        |         |             |         |           | 1420       | 1304        | 1325         | 733               | 1322       |
| Tapirhybrid       |         |             |         |           |            | 4986        | 3747         | 1083              | 3310       |
| Targetfinder      |         |             |         |           |            |             | 6147         | 1184              | 3885       |
| Target_Prediction |         |             |         |           |            |             |              | 2027              | 944        |
| Targetscan        |         |             |         |           |            |             |              |                   | 782212     |

Additional file 2
