# Supplementary material for: A comparison of performance of plant miRNA target prediction tools and the characterization of features for genome-wide target prediction
Source: PubMed Central journal article supplement (PMC4035075; doi:10.1186/1471-2164-15-348), 2014-05-08
Supplement: 12864_2014_6052_MOESM5_ESM.pdf [file 12864_2014_6052_MOESM5_ESM.pdf]

A

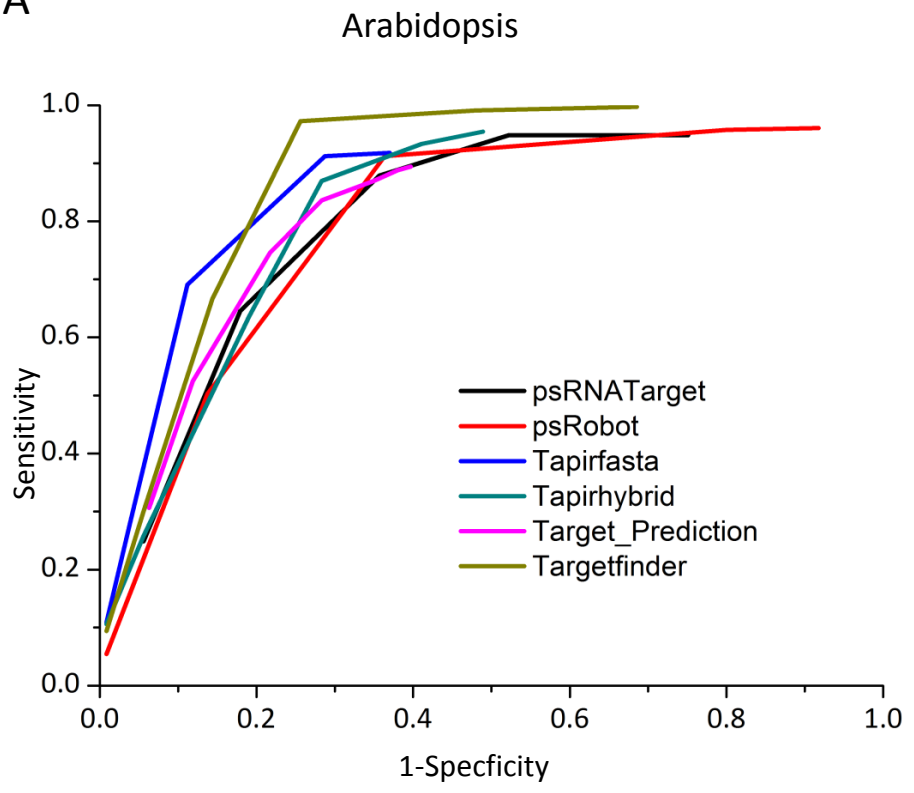

B

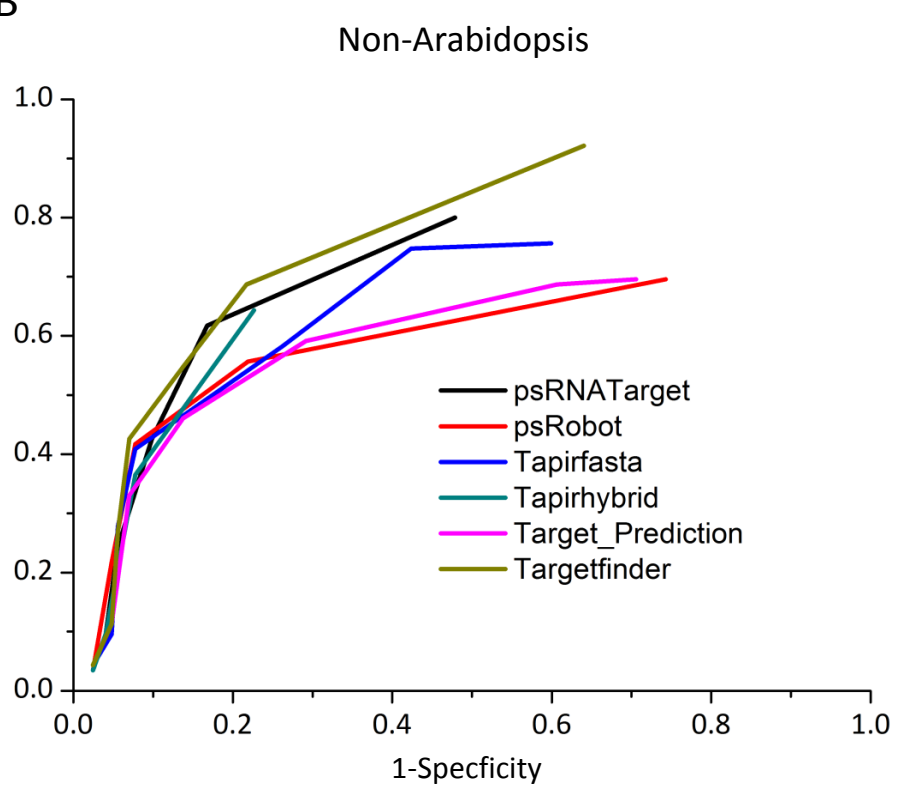

C

| Tools/ Area Under Curve (AUC) | psRNATarget | psRobot | Tapirfasta | Tapirhybrid | Target_Prediction | Targetfinder |
|-------------------------------|-------------|---------|------------|-------------|-------------------|--------------|
| Arabidopsis                   | 0.81        | 0.8     | 0.86       | 0.83        | 0.82              | 0.88         |
| Non-Arabidopsis               | 0.74        | 0.63    | 0.69       | 0.72        | 0.63              | 0.78         |
