# Supplementary material for: A comparison of performance of plant miRNA target prediction tools and the characterization of features for genome-wide target prediction
Source: PubMed Central journal article supplement (PMC4035075; doi:10.1186/1471-2164-15-348), 2014-05-08
Supplement: 12864_2014_6052_MOESM6_ESM.pdf [file 12864_2014_6052_MOESM6_ESM.pdf]

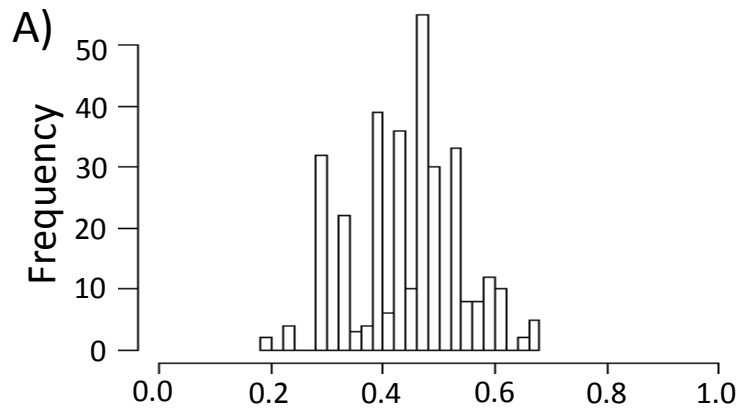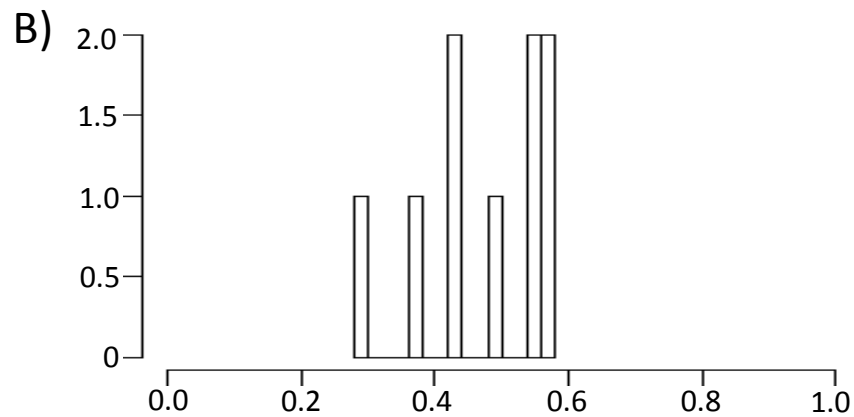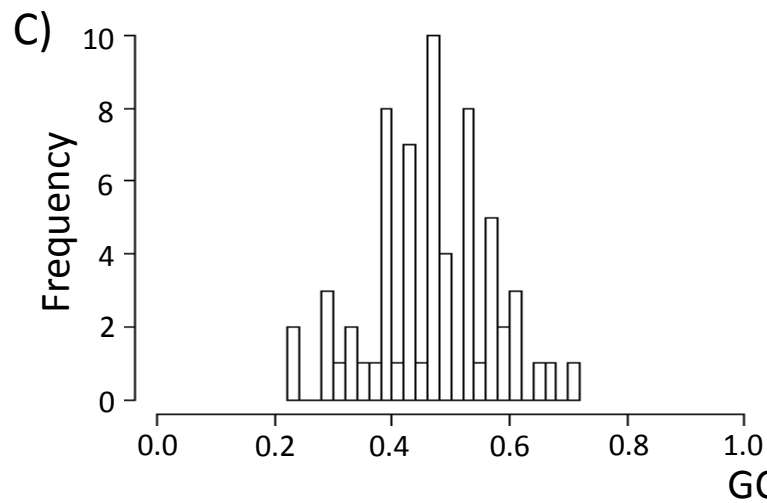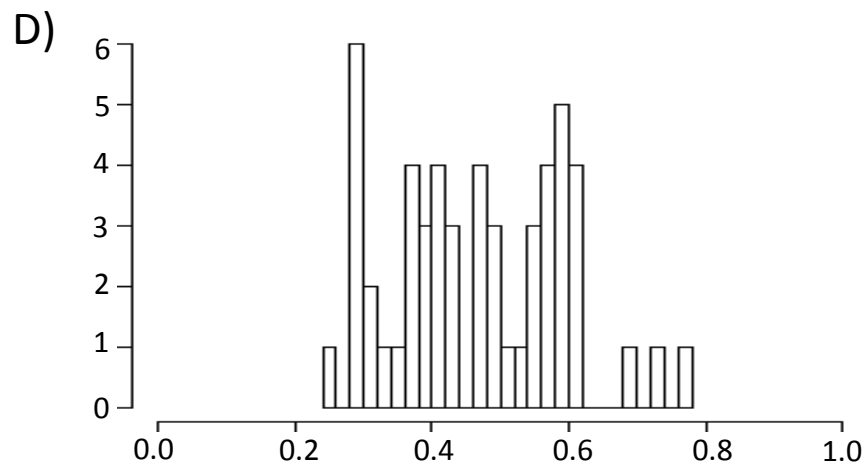

Additional file 6
