# Supplementary material for: A comparison of performance of plant miRNA target prediction tools and the characterization of features for genome-wide target prediction
Source: PubMed Central journal article supplement (PMC4035075; doi:10.1186/1471-2164-15-348), 2014-05-08

Arabidopsis

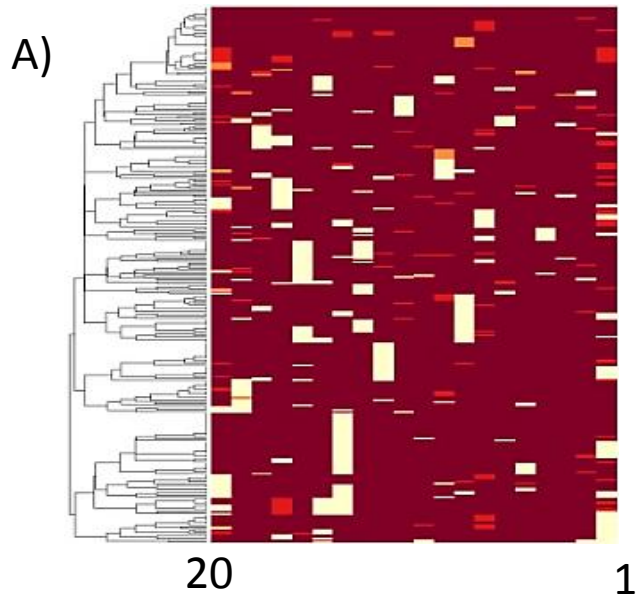

Non-Arabidopsis

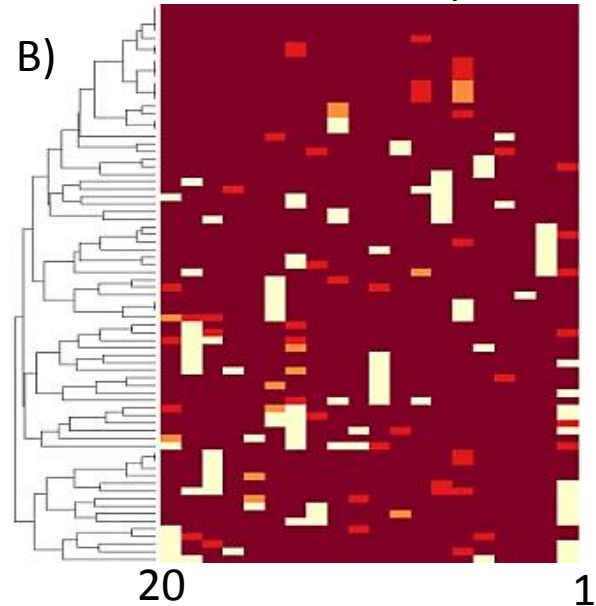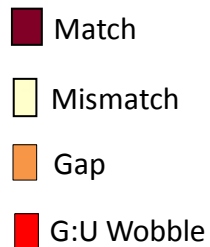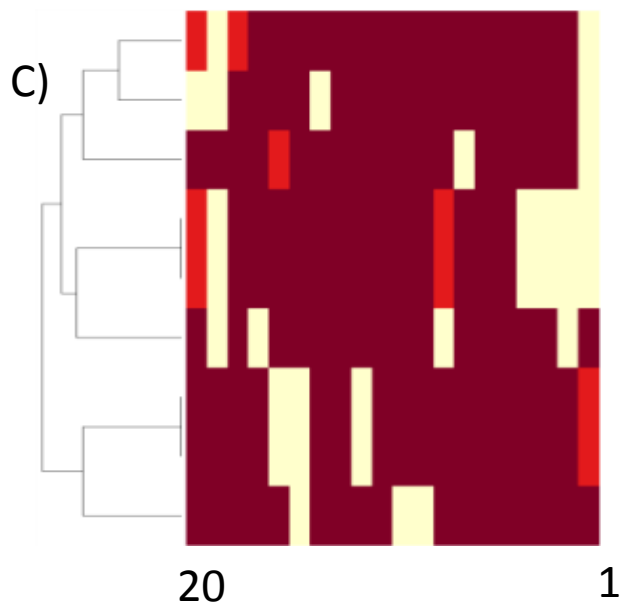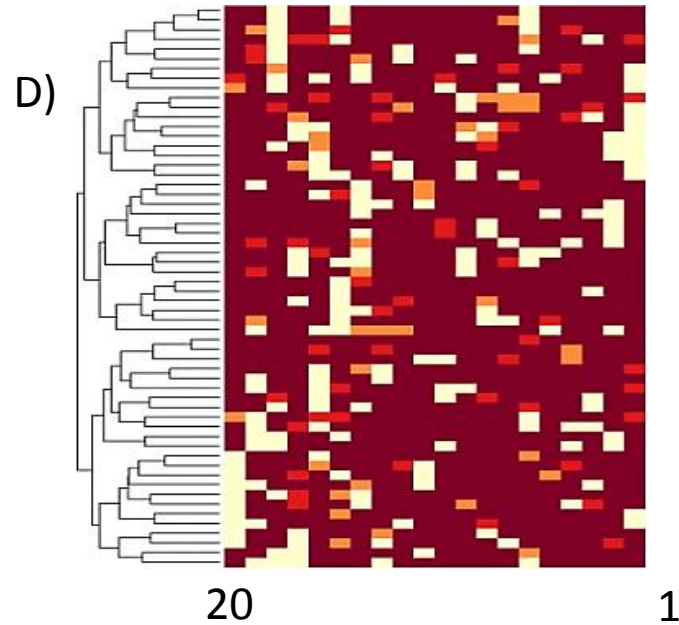

Supplement: 12864_2014_6052_MOESM7_ESM.pdf [file 12864_2014_6052_MOESM7_ESM.pdf]
